# Supplementary material for: Trace copper ion detection by the suppressed decolorization of chromotrope 2R complex
Source: Royal Society of Chemistry journal article supplement (doi:10.1039/c4ay02414a), 2014-10-31
Supplement: c4ay02414a1.pdf [file c4ay02414a1.pdf]

## Supporting information for

# Trace Copper Ion Detection by Photocatalytic Degradation of Chromotrope 2R

Lili Fu, Yuan Xiong, Shu Chen, Yunfei Long\*

Key Laboratory of Theoretical Chemistry and Molecular Simulation of Ministry of  
Education of China, School of Chemistry and Chemical Engineering, Hunan  
University of Science and Technology, Xiangtan, 411201, PR China

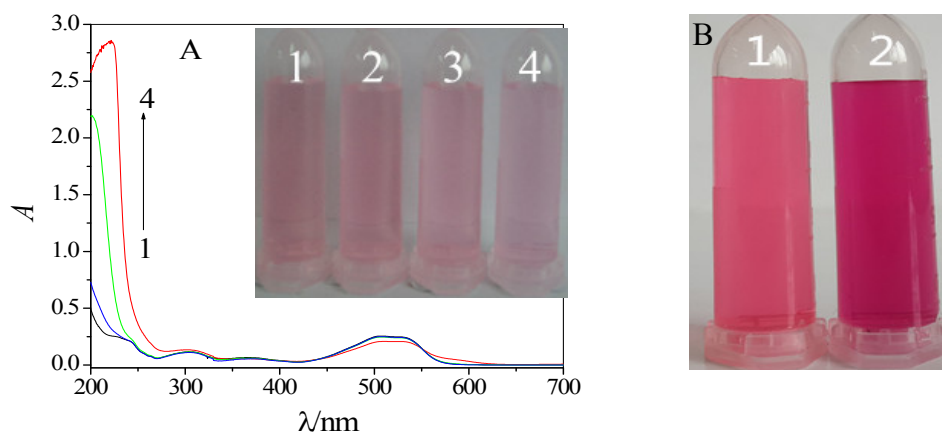

Fig. S1. A. The UV-visible absorption spectra of CR added with different concentrations of  $\text{Cu}^{2+}$  0,  $1.0 \times 10^{-5}$ ,  $1.0 \times 10^{-4}$ ,  $1.0 \times 10^{-3}$  mol  $\text{L}^{-1}$  (line 1–4) without UVC light irradiation and partly amplified in the insert. The solutions were controlled at pH 4.78,  $c_{\text{CR}}$  ( $1.0 \times 10^{-5}$  mol  $\text{L}^{-1}$ ).

Fig.S1.B. The two pictures are CR (1) and CR- $\text{Cu}^{2+}$  (2) without UVC light irradiation, respectively. The solutions were controlled at pH 4.78,  $c_{\text{CR}}$  ( $1.0 \times 10^{-4}$  mol  $\text{L}^{-1}$ ),  $c_{\text{Cu}^{2+}}$  ( $1.0 \times 10^{-3}$  mol  $\text{L}^{-1}$ ).

\* Corresponding author. E-mail: l\_yunfei927@163.com, Tel.: +86 731 58388503.

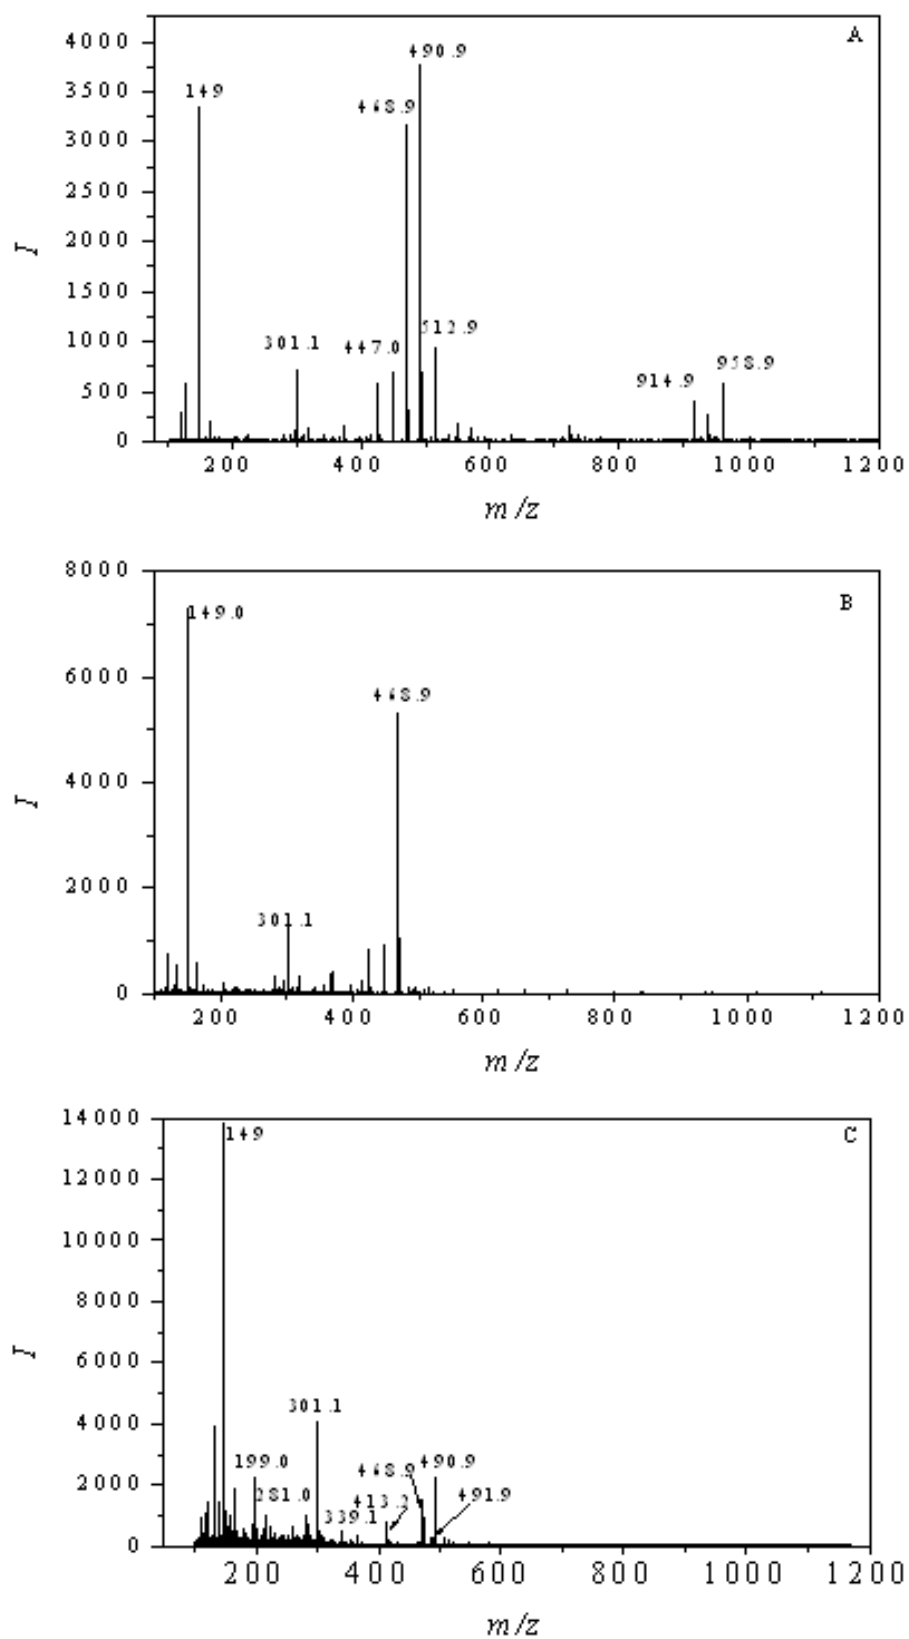

Fig. S2. The Mass spectrogram of CR in the presence of  $\text{Cu}^{2+}$  ( $1 \times 10^{-6} \text{ mol L}^{-1}$ ) without UVC irradiation (A), CR without UVC irradiation (B), CR under UVC irradiation (C).  $c_{\text{CR}} = 1 \times 10^{-5} \text{ mol L}^{-1}$ .

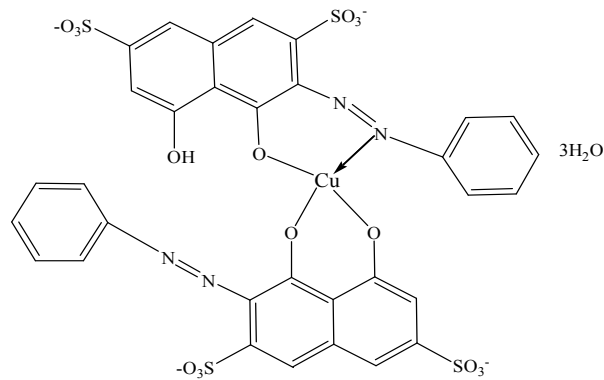

Fig. S3. The possible structure of the complexes formed from CR and  $\text{Cu}^{2+}$ .

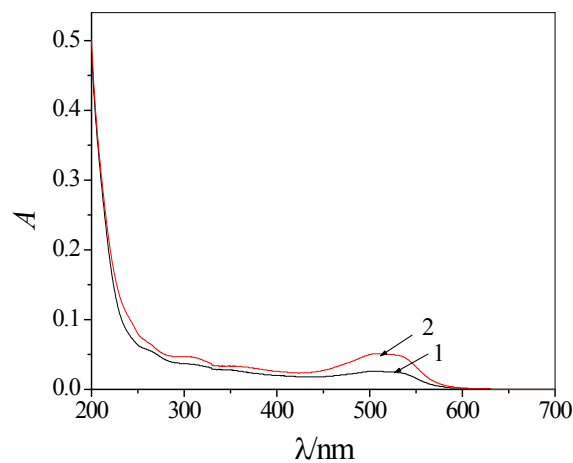

Fig. S4. The UV-visible absorption spectra of CR- $\text{Cu}^{2+}$  deoxygenate (curve 2) and without deoxygenate (curve 1) under the UV light irradiation for 50 min. The solutions were controlled at pH 4.78,  $c_{\text{CR}} (1.0 \times 10^{-5} \text{ mol L}^{-1})$ .  $c_{\text{Cu}^{2+}} (1.0 \times 10^{-6} \text{ mol L}^{-1})$

Fig. S5. UV-visible absorption spectra of  $1 \times 10^{-5} \text{ M}$  CR solution in the presence of BR

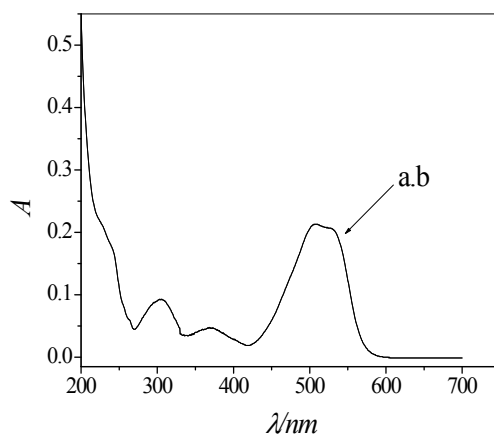

pH=4.78 and absence of  $\text{Cu}^{2+}$  ions under the natural light irradiation for 50min (spectrum a) and shielding from light for 50 min (spectrum b).

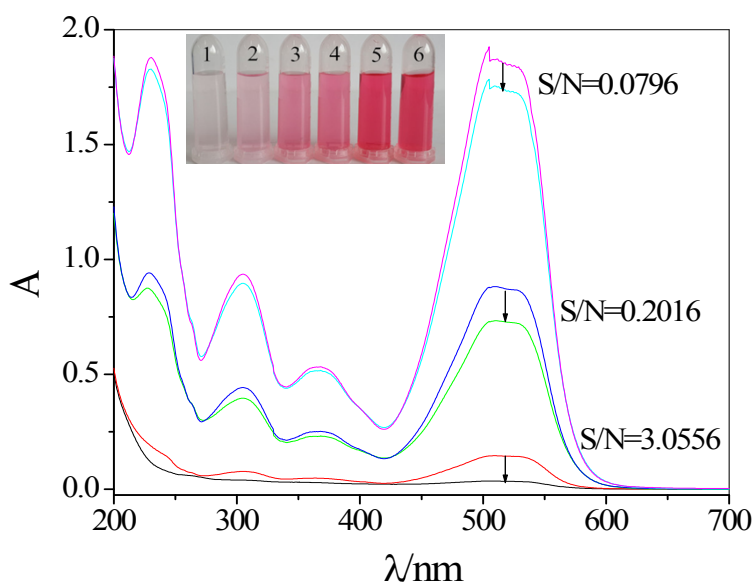

Fig. S6. UV-visible absorption spectra of three different concentrations of CR solutions  $1.0 \times 10^{-5} \text{M}$  (1, 2),  $5.0 \times 10^{-5} \text{M}$  (3, 4) and  $1.0 \times 10^{-4} \text{M}$  (5, 6) in the absence (1, 3, 5) and presence (2, 4, 6) of  $1.0 \times 10^{-6} \text{M}$  copper ions under UV irradiation. The inserted picture shows that the color distinction of CR solutions ( $1.0 \times 10^{-5} \text{M}$ ) in the absence (1) and presence (2) of  $\text{Cu}^{2+}$  ( $1.0 \times 10^{-6} \text{M}$ ) is the most obvious of three different concentrations of CR solutions.

Table S1 Comparison of the sensitivity for copper ion detection in recent spectral methods.

| Method                       | probe                                             | Linear range( $\mu\text{M}$ ) | Detection limit( $\mu\text{M}$ ) | Ref.      |
|------------------------------|---------------------------------------------------|-------------------------------|----------------------------------|-----------|
| Fluorescence/<br>colorimetry | a new<br>spirobenzopyra<br>n derivative           | 0.513-381                     | 0.106                            | [1]       |
| Fluorescence                 | Carbon<br>Quantum Dots                            | 0.01-1.1                      | 0.006                            | [2]       |
| Fluorescence                 | Copper/Silver<br>Nanoclusters                     | 0.005-0.2                     | 0.0027                           | [3]       |
| Absorption/colorimetry       | The conversion<br>of spiropyran to<br>merocyanine | Not given                     | 1.0                              | [4]       |
| Absorption                   | dual-DNAzyme<br>probe                             | 1.0-10000                     | 1.0                              | [5]       |
| Absorption                   | Chromotrope<br>2R complex                         | 0.005-1.0                     | 0.0034                           | This work |

Table S2. The determination results of a real sample

| Sample     | Detection value ( $\mu\text{g g}^{-1}$ ) | Average ( $\mu\text{g g}^{-1}$ ) | RSD   |
|------------|------------------------------------------|----------------------------------|-------|
| Human hair | 3.565, 3.798, 3.798                      | 3.72                             | 3.62% |

Reference:

- 1 N. Shao, J.Y. Jin, H. Wang, Y. Zhang, R.H. Yang, W.H. Chan, *Anal. Chem.*, 2008, 80, 3466.
- 2 Y. Dong, R. Wang, G. Li, C. Chen, Y. Chi, G. Chen, *Anal. Chem.*, 2012, **84**, 6220.
- 3 Y.-T. Su, G.-Y. Lan, W.-Y. Chen, H.-T. Chang, *Anal. Chem.*, 2010, **82**, 8566.
- 4 Z.-Q. Guo, W.-Q. Chen, X.-M. Duan, *Org. Lett.*, 2010, **12**, 2202.
- 5 B.-C. Yin, B.-C. Ye, W. Tan, H. Wang, C.-C. Xie, *J. Am. Chem. Soc.*, 2009, **13**, 14624.
